# Supplementary material for: Molecular dynamics simulations of organohalide perovskite precursors: solvent effects in the formation of perovskite solar cells
Source: Royal Society of Chemistry journal article supplement (doi:10.1039/c5cp03220b), 2015-01-01
Supplement: c5cp03220b1.pdf [file c5cp03220b1.pdf]

# Molecular Dynamics Simulation of Organohalide Perovskite Precursors: solvent effects in the formation of Perovskite solar cells - Electronic Supplementary Information (ESI)

Juan José Gutierrez-Sevillano<sup>a</sup>, Shahzada Ahmad<sup>b</sup>, Sofía Calero<sup>a</sup>, Juan A. Anta<sup>a,\*</sup>

<sup>a</sup> *Área de Química Física, Universidad Pablo de Olavide, Sevilla, Spain.*

<sup>b</sup> *Abengoa Research, Abengoa, C/Energía Solar n° 1, Campus Palmas Altas, 41014 Sevilla,  
Spain*

**Table S1.** Lennard Jones parameters and point charges for all species.\*

| Atom types                        | Epsilon (kJ/mol) | Sigma (nm) | Charge (e) |
|-----------------------------------|------------------|------------|------------|
| <b>Precursors</b>                 |                  |            |            |
| C_MeNH <sub>3</sub>               | 0.45773          | 0.3399     | -0.160     |
| N_MeNH <sub>3</sub>               | 0.71128          | 0.325      | -0.340     |
| H <sub>C</sub> _MeNH <sub>3</sub> | 0.06569          | 0.1959     | 0.156      |
| H <sub>N</sub> _MeNH <sub>3</sub> | 0.06569          | 0.1069     | 0.344      |
| Pb <sup>++</sup>                  | 0.2394           | 0.3132*    | 2.0        |
| I <sup>-</sup>                    | 0.4080           | 0.540*     | -1.0       |
| <b>Solvents</b>                   |                  |            |            |
| O_water                           | 0.6489           | 0.3166     | -0.8476    |
| H_water                           | -                | -          | 0.4238     |
| CH <sub>3</sub> _pentane          | 0.8149           | 0.375      | 0.0        |
| CH <sub>2</sub> _pentane          | 0.3825           | 0.395      | 0.0        |

\* Sigma parameters were modified in some simulations to reproduce the correct crystall structure of the perovskite

**Table S2.** Diffusion coefficient and model parameters of precursors and solvents used in this work. These values were obtained between  $10^3$  and  $2 \cdot 10^3$  ps.

| #Precursors                                     | Diffusion Coefficient (m <sup>2</sup> /s) | $\alpha$ | Diffusion Coefficient (m <sup>2</sup> /s) | $\alpha$ |
|-------------------------------------------------|-------------------------------------------|----------|-------------------------------------------|----------|
| Solvent                                         | pentane                                   |          | water                                     |          |
| 10                                              | $4.1710^{-3}$                             | 0.95     | $1.1310^{-3}$                             | 0.98     |
| 20                                              | $2.6010^{-3}$                             | 0.97     | $1.0510^{-3}$                             | 0.97     |
| 30                                              | $1.3110^{-3}$                             | 0.94     | $9.0610^{-4}$                             | 0.97     |
| 40                                              | $6.2710^{-4}$                             | 0.92     |                                           |          |
| 50                                              | $2.4710^{-4}$                             | 0.89     |                                           |          |
| [CH <sub>3</sub> NH <sub>3</sub> ] <sup>+</sup> |                                           |          |                                           |          |
| 10                                              | $2.5410^{-4}$                             | 0.80     | $8.4210^{-4}$                             | 0.97     |
| 20                                              | $6.8010^{-5}$                             | 0.95     | $6.7710^{-4}$                             | 0.971    |
| 30                                              | $1.5310^{-5}$                             | 0.74     | $5.3810^{-4}$                             | 0.93     |
| 40                                              | $8.8810^{-6}$                             | 0.72     |                                           |          |
| 50                                              | $2.8910^{-6}$                             | 0.49     |                                           |          |
| I <sup>-</sup>                                  |                                           |          |                                           |          |
| 10                                              | $2.3110^{-4}$                             | 0.84     | $7.7210^{-4}$                             | 1.00     |
| 20                                              | $6.6410^{-5}$                             | 0.98     | $6.2010^{-4}$                             | 0.96     |
| 30                                              | $1.5110^{-5}$                             | 0.85     | $4.2810^{-4}$                             | 0.99     |
| 40                                              | $7.5310^{-6}$                             | 0.80     |                                           |          |
| 50                                              | $1.6310^{-6}$                             | 0.58     |                                           |          |
| Pb <sup>++</sup>                                |                                           |          |                                           |          |
| 10                                              | $2.2210^{-4}$                             | 0.88     | $2.5410^{-4}$                             | 0.87     |
| 20                                              | $6.5310^{-5}$                             | 0.99     | $2.6110^{-4}$                             | 0.99     |
| 30                                              | $1.5010^{-5}$                             | 0.89     | $2.0110^{-4}$                             | 0.94     |
| 40                                              | $6.6310^{-6}$                             | 0.81     |                                           |          |
| 50                                              | $1.4010^{-6}$                             | 0.63     |                                           |          |

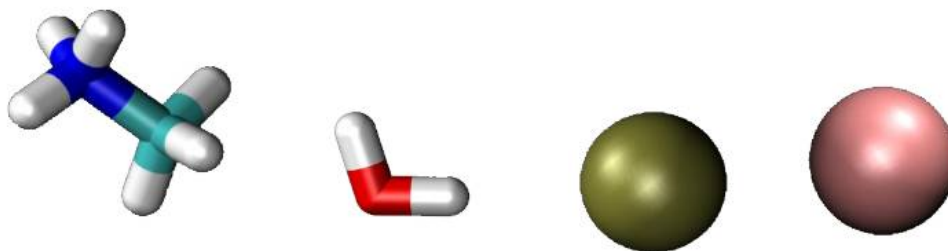

**Figure S1.** Molecular models used in this work. The key color for atoms is: I pink, Pb tan, C cyan, N blue, and H white.

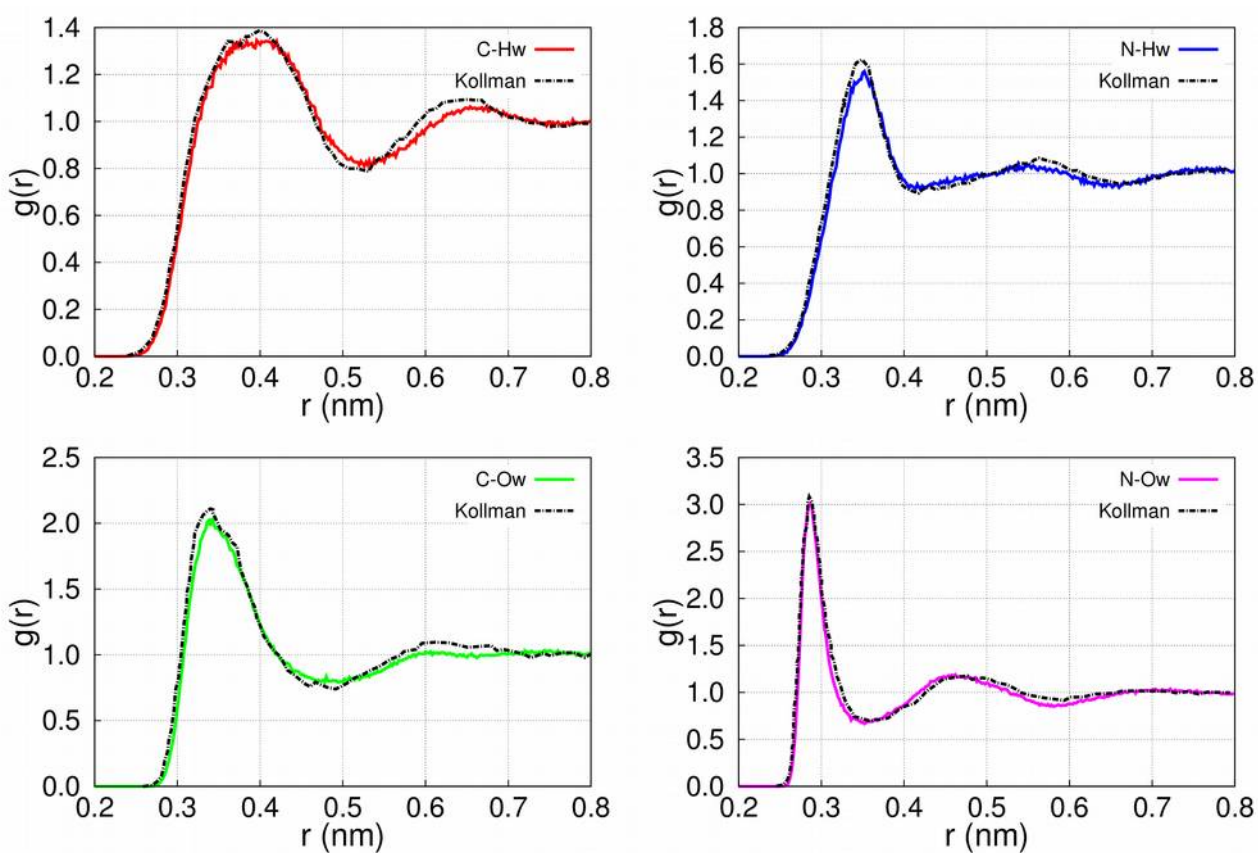

**Figure S2.** Radial distribution functions as obtained from MD simulations in the NVT ensemble for  $\text{CH}_3\text{NH}_3\text{I}$  precursors in water (from left-top to right-bottom: carbon-water hydrogen, nitrogen-water hydrogen, carbon-water oxygen and nitrogen-water oxygen). Results from this work (solid color line) are compared with the data of Meng and Kollman.<sup>1</sup>

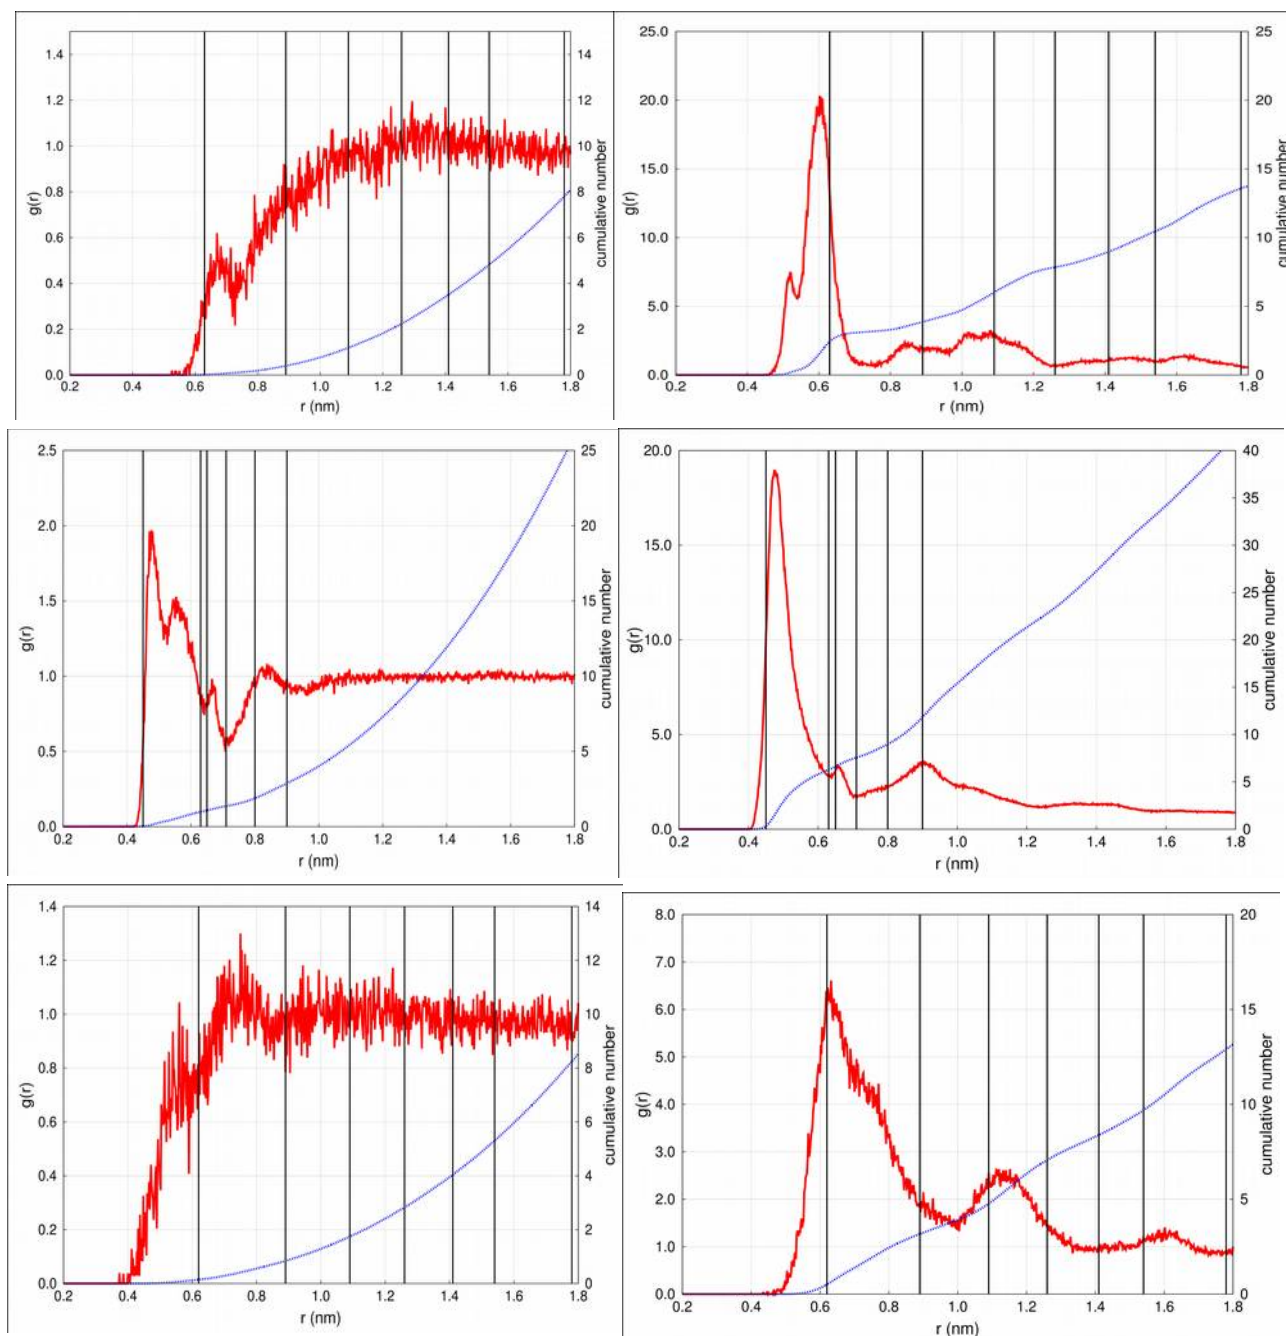

**Figure S3.** RDFs (red line) and coordination number (blue dotted line) for Pb<sup>++</sup>-Pb<sup>++</sup> (top), I<sup>-</sup>-I<sup>-</sup> (center), and [CH<sub>3</sub>NH<sub>3</sub>]<sup>+</sup> (bottom) extracted from equilibrated MD simulations with 20 CH<sub>3</sub>NH<sub>3</sub>PbI<sub>3</sub> precursors in water (left) and in pentane (right). Vertical lines stand for the crystallographic positions of solid CH<sub>3</sub>NH<sub>3</sub>PbI<sub>3</sub> as extracted from Ref.<sup>2</sup>

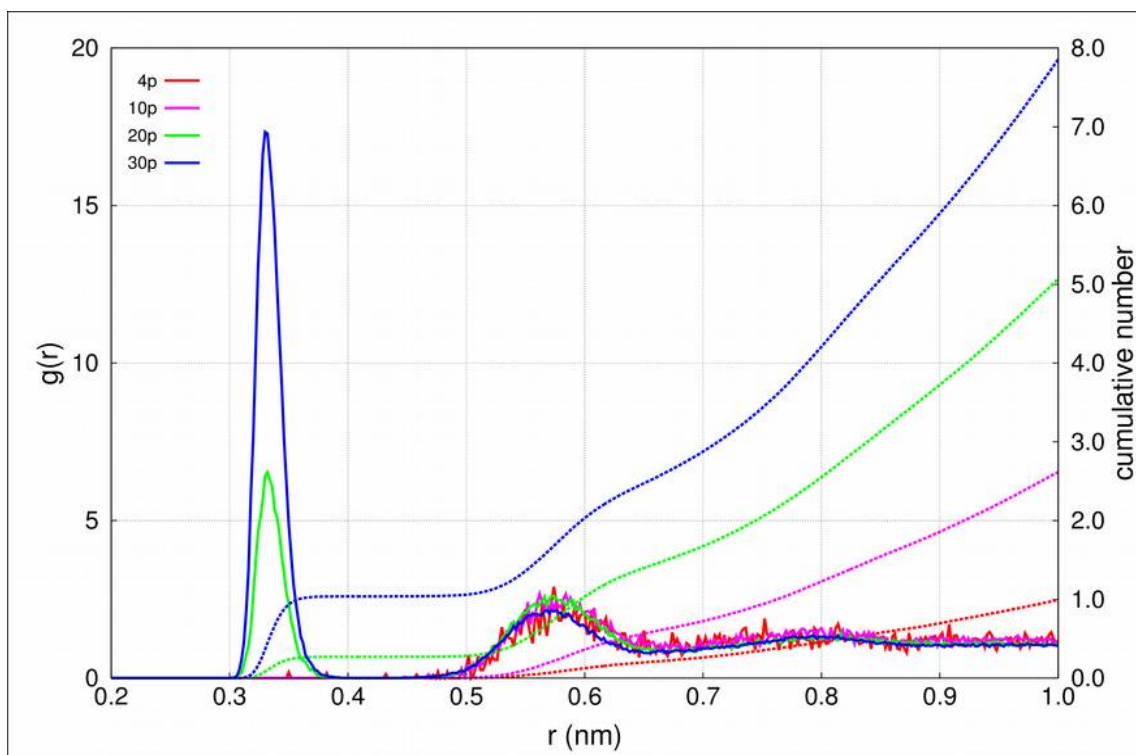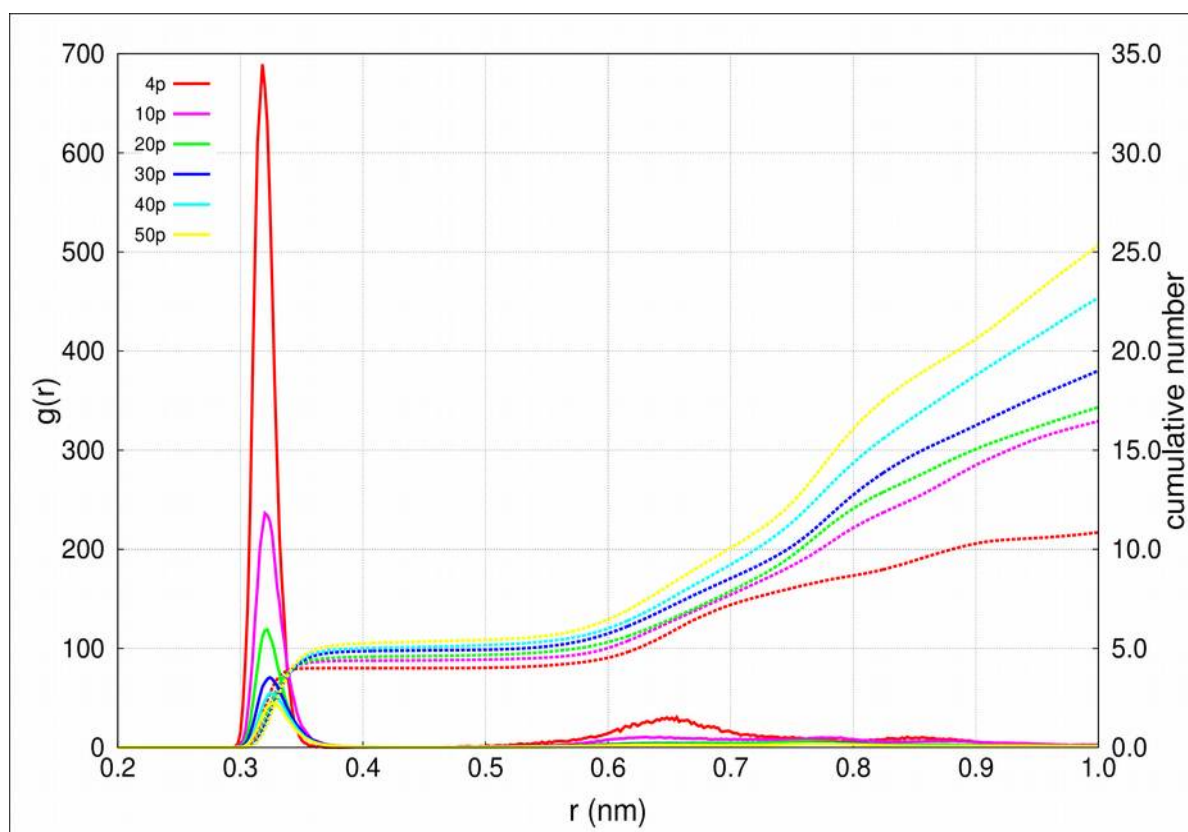

**Figure S4.**  $\text{Pb}^{2+}$ -I RDFs (solid line) and coordination number (dotted line) for different number of precursor units in water (top) and in pentane (bottom).

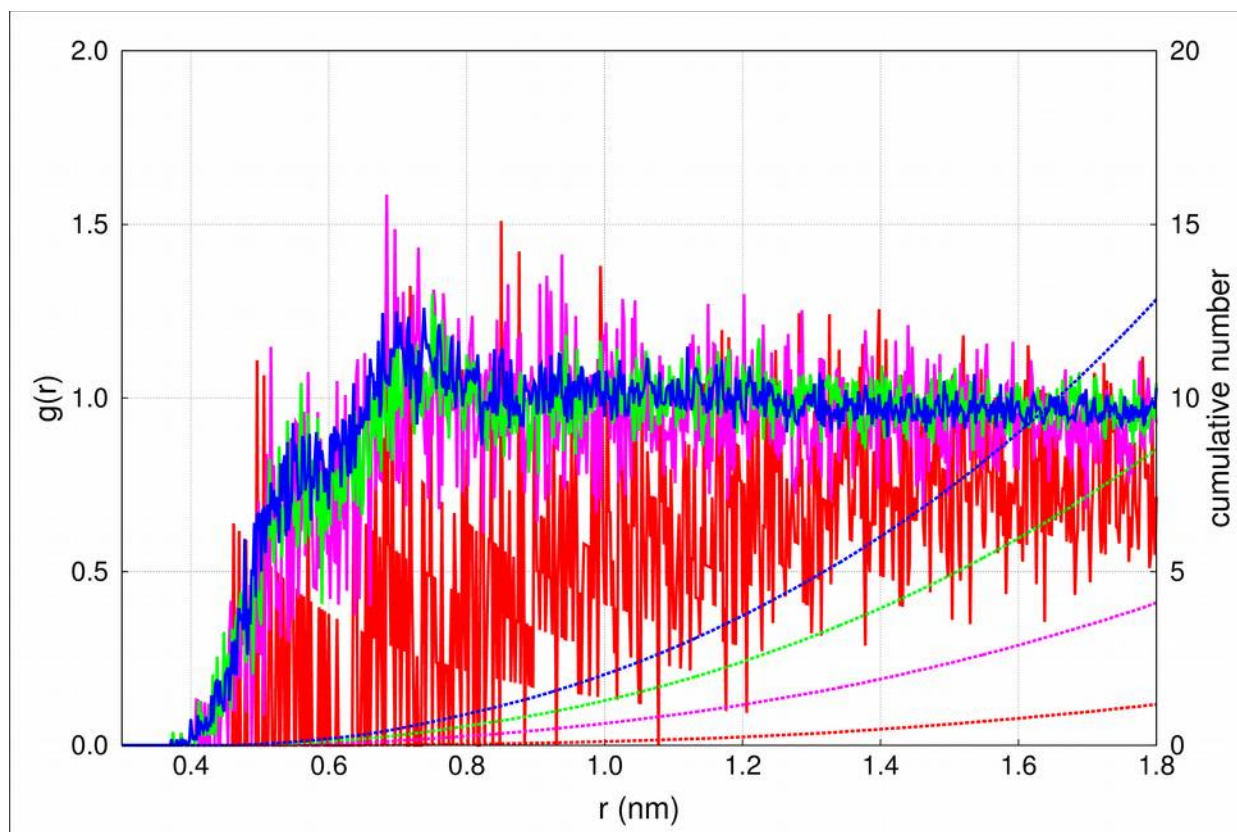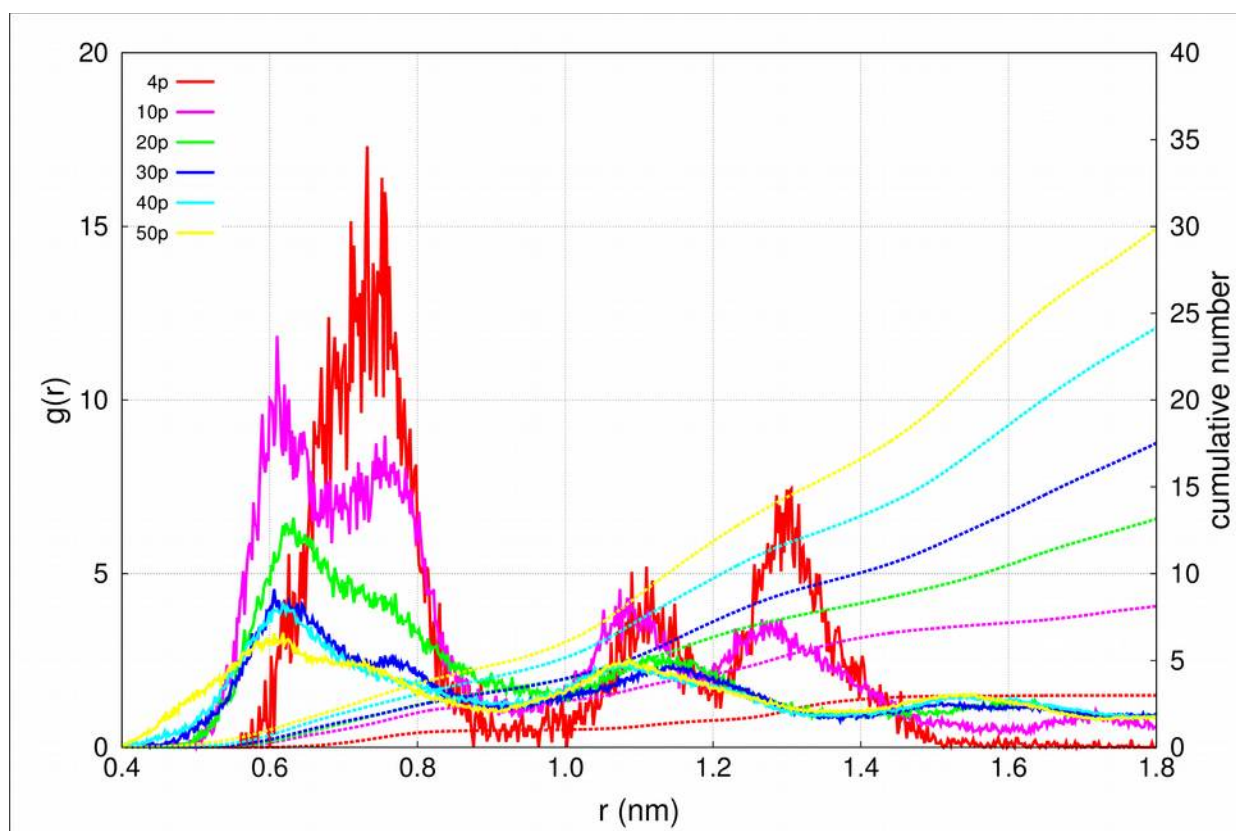

**Figure S5.**  $[\text{CH}_3\text{NH}_3]^+ - [\text{CH}_3\text{NH}_3]^+$  RDFs (solid line) and coordination number (dotted line) for different number of precursor units in water (top) and in pentane (bottom).



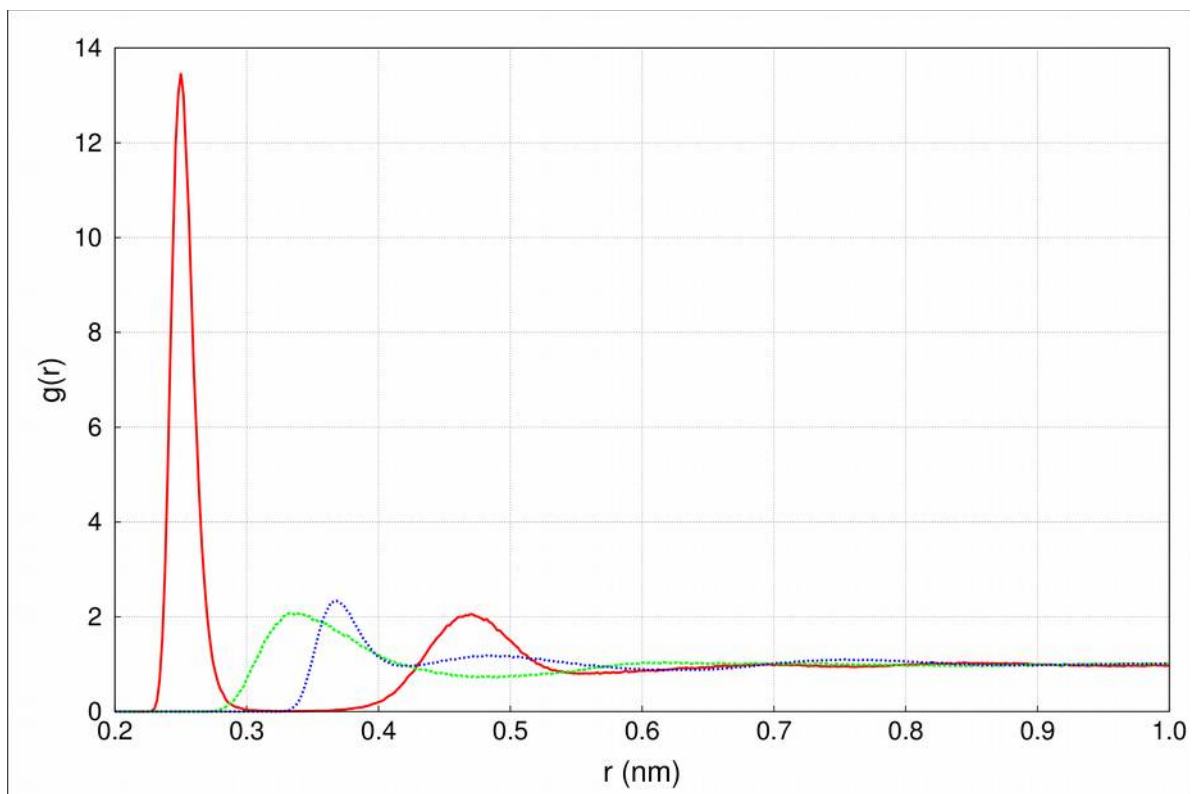

**Figure S6.** RDFs of  $\text{Pb}^{++}\text{-O}_{\text{water}}$  (red line),  $[\text{CH}_3\text{NH}_3]^+\text{-O}_{\text{water}}$  (green line), and  $\text{I}\text{-O}_{\text{water}}$  (blue line), from simulations with 20  $\text{CH}_3\text{NH}_3\text{PbI}_3$  precursors in water.

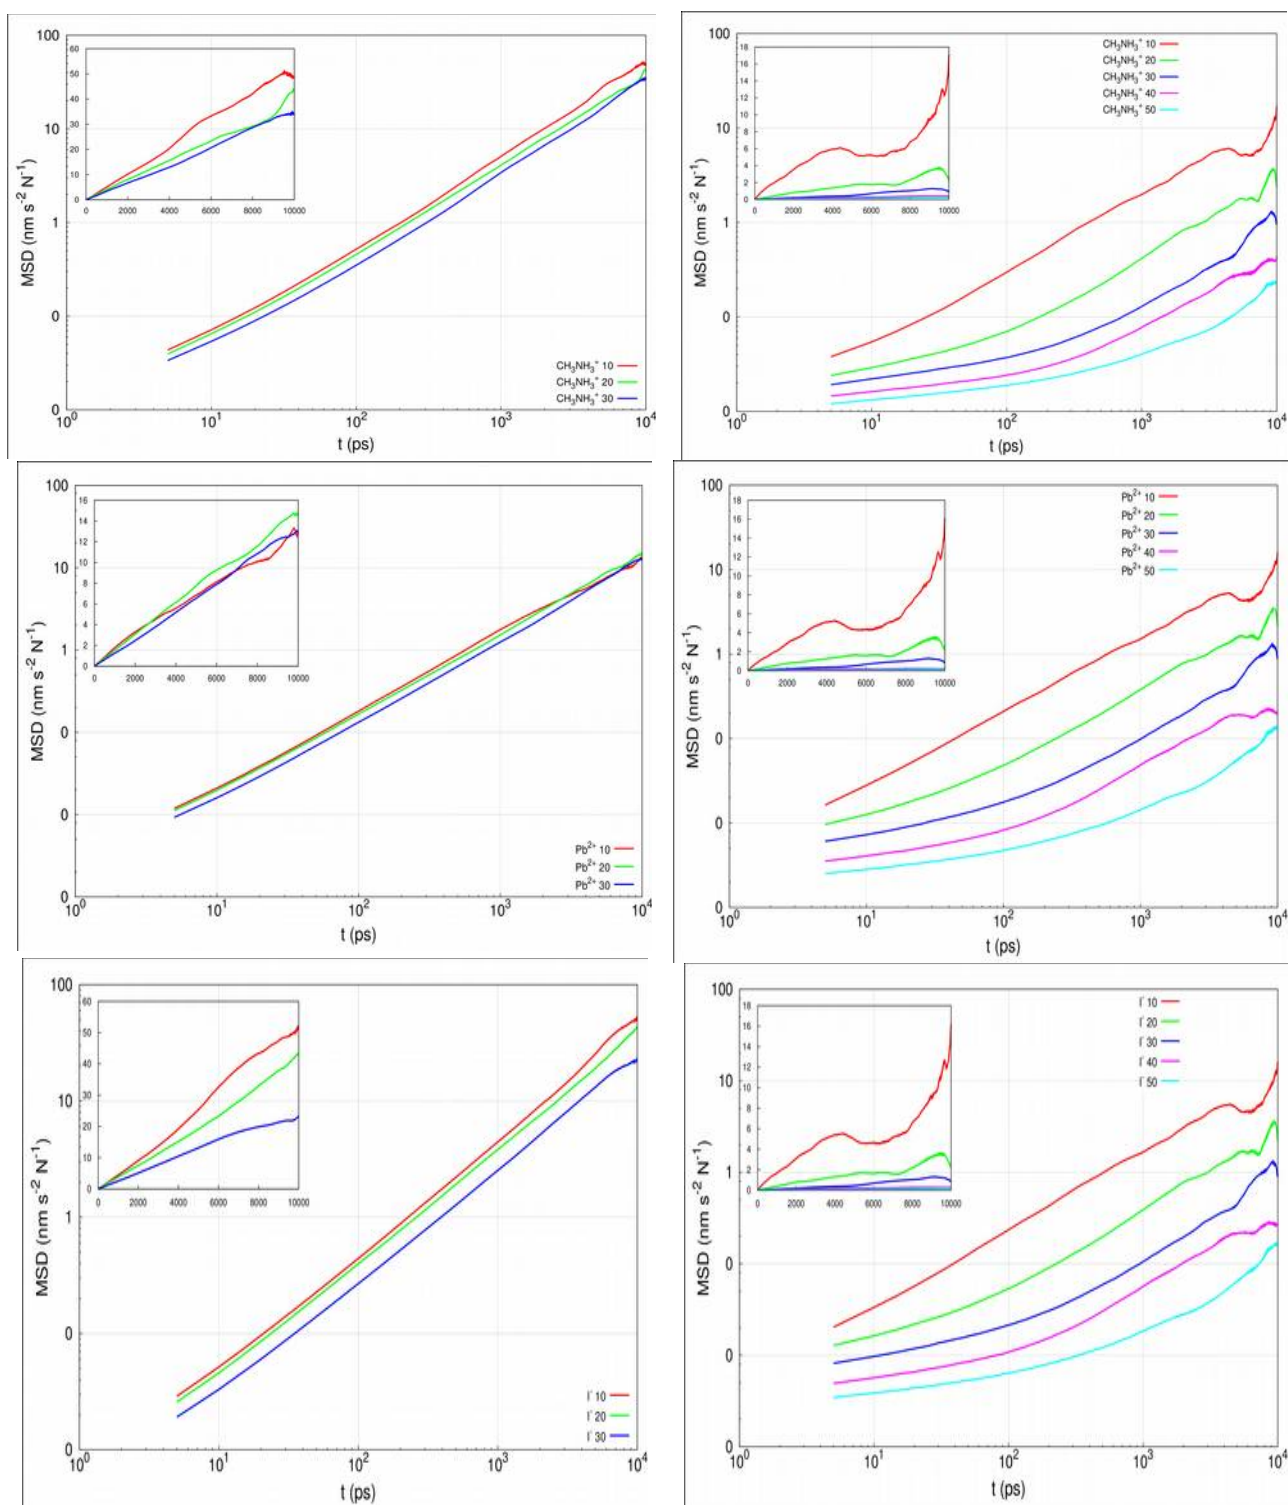

**Figure S7.** MSDs of  $[\text{CH}_3\text{NH}_3]^+$  (top),  $\text{Pb}^{2+}$  (center), and  $\text{I}^-$  (bottom) from MD simulations as a function of the number of precursors for water (left) and pentane (right).



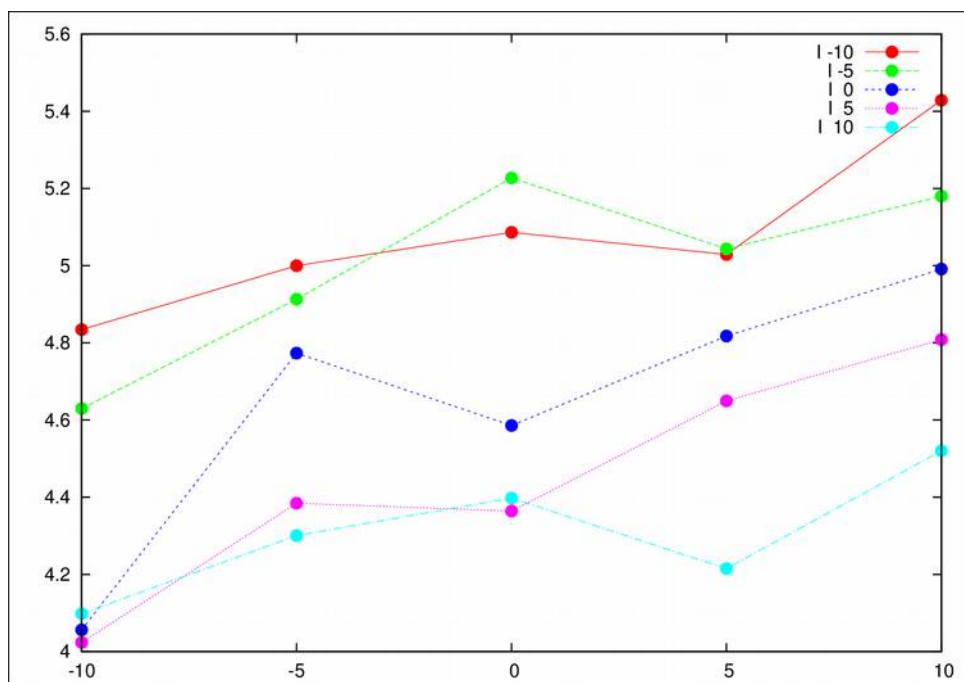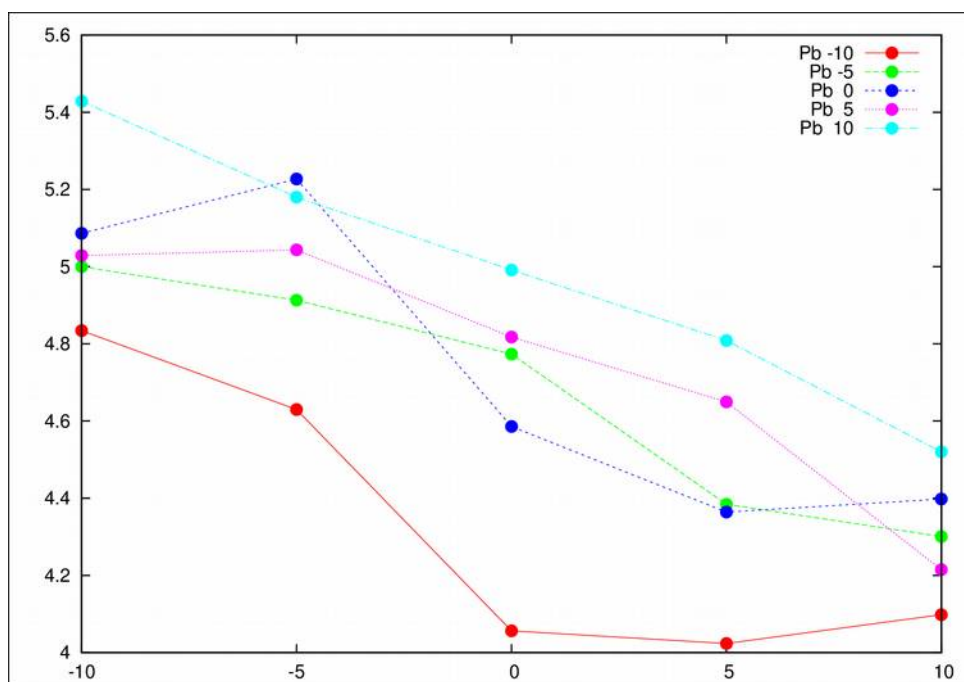

**Figure S8.** Pb-I coordination number as a function of the percentage variation of the  $\sigma$ -parameter of Pb (top) and I (bottom) keeping the other parameter fixed.

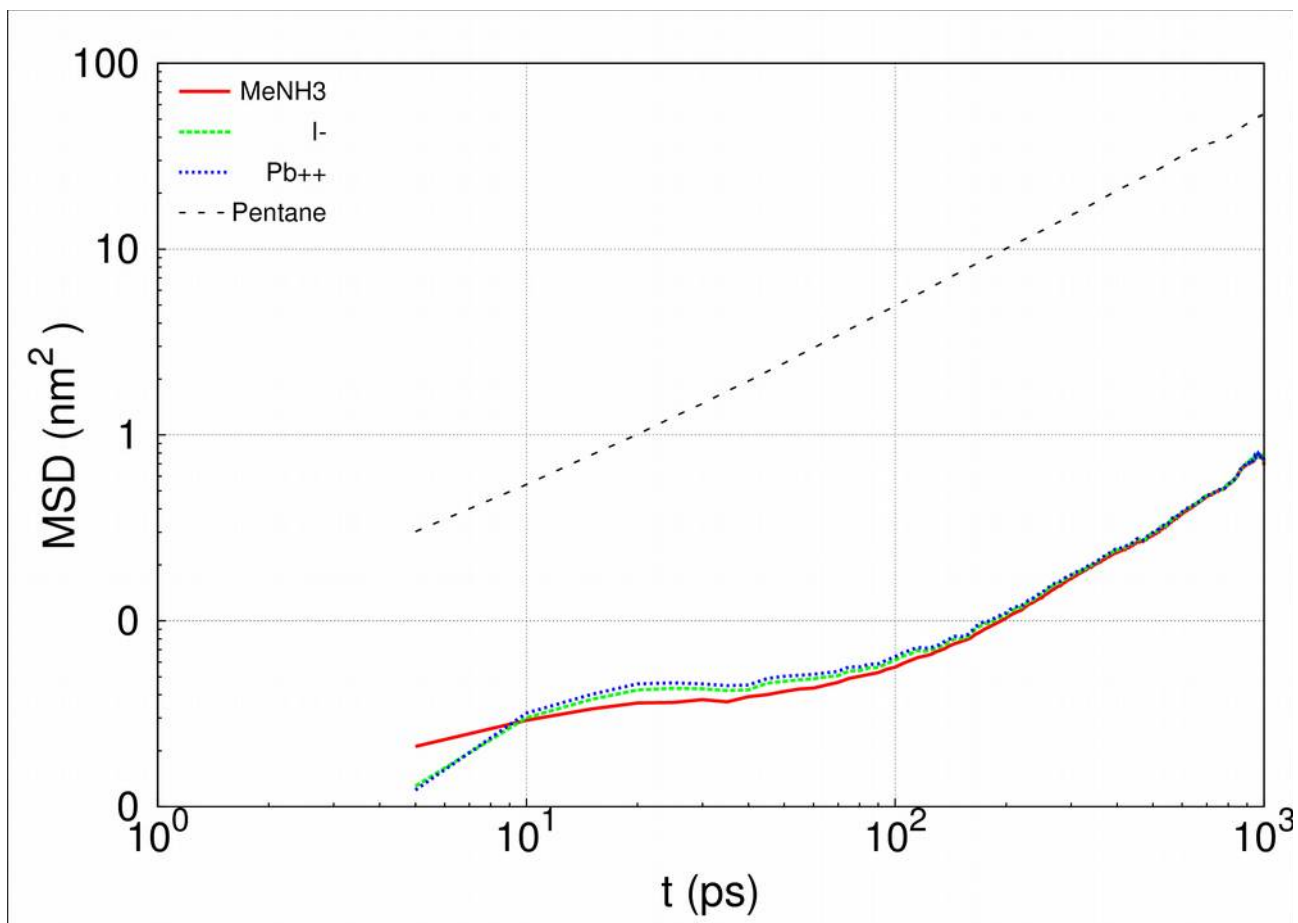

**Figure S9.** MSDs from the MD of the solid in the presence of pentante molecules.

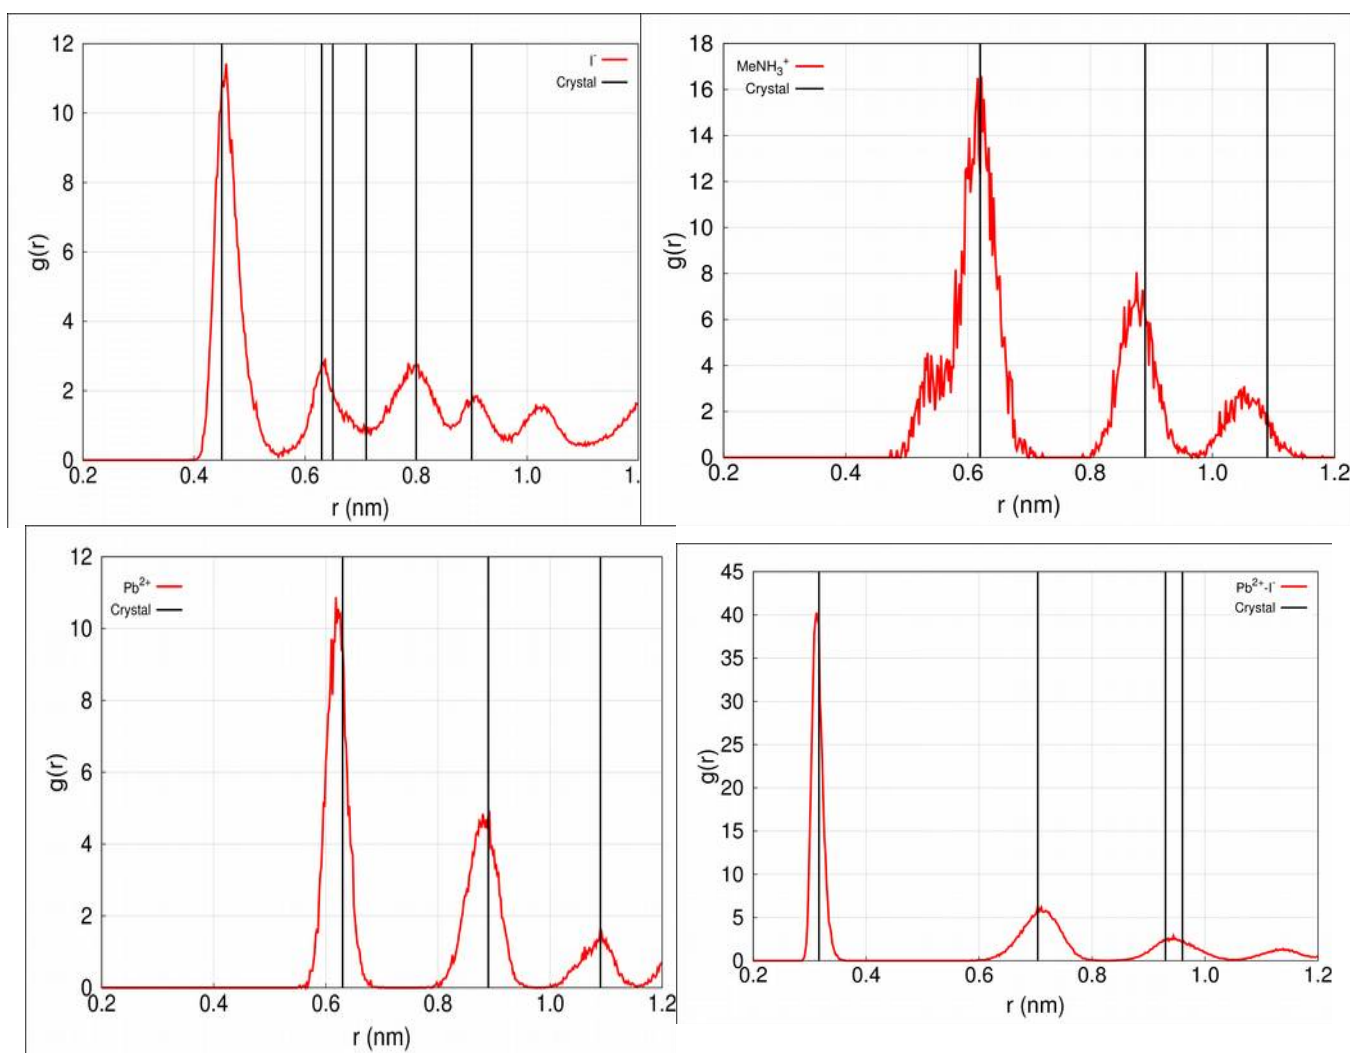

**Figure S10.** RDF extracted from simulations of the solid-perovskite in the presence of pentane molecules

## References

- (1) Meng, E. C.; Kollman, P. A. Molecular Dynamics Studies of the Properties of Water around Simple Organic Solutes. *J. Phys. Chem.* **1996**, *100* (27), 11460–11470.
- (2) Dang, Y.; Liu, Y.; Sun, Y.; Yuan, D.; Liu, X.; Lu, W.; Liu, G.; Xia, H.; Tao, X. Bulk Crystal Growth of Hybrid Perovskite Material CH<sub>3</sub>NH<sub>3</sub>PbI<sub>3</sub>. *CrystEngComm* **2014**, *17* (3), 665–670.
